# Supplementary material
Source: PubMed Central journal article supplement (PMC1187953)
Supplement: pnas_0409746102_16.pdf [file pnas_0409746102_16.pdf]

Table 1: A comparison between the target grammar of Adriaans and Vervoort (*left*) and the grammar induced by a single ADIOS instance (*right*)

| Target grammar                                                                                                                                                                                          | Inferred grammar                                                                                                                                                                                                                                                                                                                                                                                                                                                                                                                                                                                                                                                                                                                                                                                                                                                                                                                                                                                                                                                               |
|---------------------------------------------------------------------------------------------------------------------------------------------------------------------------------------------------------|--------------------------------------------------------------------------------------------------------------------------------------------------------------------------------------------------------------------------------------------------------------------------------------------------------------------------------------------------------------------------------------------------------------------------------------------------------------------------------------------------------------------------------------------------------------------------------------------------------------------------------------------------------------------------------------------------------------------------------------------------------------------------------------------------------------------------------------------------------------------------------------------------------------------------------------------------------------------------------------------------------------------------------------------------------------------------------|
| $[NP_a] \Rightarrow \text{John} \mid \text{Mary} \mid \text{the man} \mid \text{the child}$                                                                                                             | E35 $\Rightarrow$ child $\mid$ man<br>P34 $\Rightarrow$ the E35<br>E37 $\Rightarrow$ John $\mid$ Mary $\mid$ P34                                                                                                                                                                                                                                                                                                                                                                                                                                                                                                                                                                                                                                                                                                                                                                                                                                                                                                                                                               |
| $[P] \Rightarrow \text{with} \mid \text{near} \mid \text{in} \mid \text{from}$                                                                                                                          | E54 $\Rightarrow$ with $\mid$ near $\mid$ in $\mid$ from                                                                                                                                                                                                                                                                                                                                                                                                                                                                                                                                                                                                                                                                                                                                                                                                                                                                                                                                                                                                                       |
| $[V_i] \Rightarrow \text{appears} \mid \text{is} \mid \text{seems} \mid \text{looks}$                                                                                                                   | E39 $\Rightarrow$ appears $\mid$ is $\mid$ seems $\mid$ looks                                                                                                                                                                                                                                                                                                                                                                                                                                                                                                                                                                                                                                                                                                                                                                                                                                                                                                                                                                                                                  |
| $[V_s] \Rightarrow \text{thinks} \mid \text{hopes} \mid \text{tells} \mid \text{says}$                                                                                                                  | E51 $\Rightarrow$ thinks $\mid$ hopes $\mid$ tells $\mid$ says                                                                                                                                                                                                                                                                                                                                                                                                                                                                                                                                                                                                                                                                                                                                                                                                                                                                                                                                                                                                                 |
| $[V_t] \Rightarrow \text{knows} \mid \text{likes} \mid \text{misses} \mid \text{sees}$                                                                                                                  | E46 $\Rightarrow$ knows $\mid$ likes $\mid$ misses $\mid$ sees                                                                                                                                                                                                                                                                                                                                                                                                                                                                                                                                                                                                                                                                                                                                                                                                                                                                                                                                                                                                                 |
| $[\text{ADV}] \Rightarrow \text{large} \mid \text{small} \mid \text{ugly} \mid \text{beautiful}$                                                                                                        | E49 $\Rightarrow$ large $\mid$ small $\mid$ ugly $\mid$ beautiful                                                                                                                                                                                                                                                                                                                                                                                                                                                                                                                                                                                                                                                                                                                                                                                                                                                                                                                                                                                                              |
| $[NP_p] \Rightarrow \text{the car} \mid \text{the city} \mid \text{the house} \mid \text{the shop}$                                                                                                     | E43 $\Rightarrow$ house $\mid$ shop                                                                                                                                                                                                                                                                                                                                                                                                                                                                                                                                                                                                                                                                                                                                                                                                                                                                                                                                                                                                                                            |
| $[S] \Rightarrow [NP] [V_i] [\text{ADV}] \mid [NP_a] [VP_a] \mid [NP_a] [V_s] \text{ that } [S]$<br>$[NP] \Rightarrow [NP_a] \mid [NP_p]$<br>$[VP_a] \Rightarrow [V_t] [NP] \mid [V_t] [NP] [P] [NP_p]$ | E69 $\Rightarrow$ P47 $\mid$ P59 $\mid$ P62 $\mid$ P66 $\mid$ P67<br>P40 $\Rightarrow$ the city<br>P41 $\Rightarrow$ the car<br><b>P36</b> $\Rightarrow$ John likes E37<br>P42 $\Rightarrow$ the E43 E39<br>P44 $\Rightarrow$ the house<br>P45 $\Rightarrow$ E37 E46<br><b>P47</b> $\Rightarrow$ P45 E37<br><b>P48</b> $\Rightarrow$ E37 E39 E49<br>P50 $\Rightarrow$ E37 E51 that<br><b>P52</b> $\Rightarrow$ P47 in the shop<br>P53 $\Rightarrow$ E54 P44<br><b>P55</b> $\Rightarrow$ P47 near P40<br>P56 $\Rightarrow$ E54 P41<br>P57 $\Rightarrow$ E54 P40<br><b>P58</b> $\Rightarrow$ P50 P50 P45 the shop<br><b>P59</b> $\Rightarrow$ P45 the shop<br><b>P60</b> $\Rightarrow$ P41 E39 E49<br><b>P61</b> $\Rightarrow$ P42 E49<br><b>P62</b> $\Rightarrow$ P45 P40<br><b>P63</b> $\Rightarrow$ P50 P50 P48<br>P64 $\Rightarrow$ E54 the shop<br><b>P65</b> $\Rightarrow$ P50 P62 P64<br><b>P66</b> $\Rightarrow$ P45 P44<br><b>P67</b> $\Rightarrow$ P45 P41<br><b>P68</b> $\Rightarrow$ E69 P53<br><b>P70</b> $\Rightarrow$ P38 E49<br><b>P71</b> $\Rightarrow$ E69 P57 |

Bold indicates root patterns.
