# Supplementary material
Source: PubMed Central journal article supplement (PMC1187953)
Supplement: pnas_0409746102_17.pdf [file pnas_0409746102_17.pdf]

Table 2: Mode A (Context-Free)

| Corpus size | L        | Recall             | Precision        | F1          |
|-------------|----------|--------------------|------------------|-------------|
| 200         | 9        | 0.3 ± 0.2          | 0.9 ± 0.1        | 0.45        |
| 200         | 8        | 0.4 ± 0.2          | 0.93 ± 0.09      | 0.59        |
| 200         | 7        | 0.6 ± 0.1          | 0.9 ± 0.1        | 0.71        |
| 200         | 6        | 0.7 ± 0.1          | 0.9 ± 0.2        | 0.78        |
| 200         | 5        | 0.78 ± 0.08        | 0.8 ± 0.2        | 0.80        |
| <b>200</b>  | <b>4</b> | <b>0.83 ± 0.06</b> | <b>0.8 ± 0.2</b> | <b>0.81</b> |
| 200         | 3        | 0.84 ± 0.06        | 0.6 ± 0.2        | 0.71        |

Bold indicates the best recall/precision.
