# Supplementary material
Source: PubMed Central journal article supplement (PMC1187953)
Supplement: pnas_0409746102_18.pdf [file pnas_0409746102_18.pdf]

Table 3: Mode B (Context-Sensitive)

| Corpus size | L        | Recall                            | Precision                         | F1          |
|-------------|----------|-----------------------------------|-----------------------------------|-------------|
| 200         | 9        | $0.5 \pm 0.2$                     | $0.8 \pm 0.1$                     | 0.65        |
| 200         | 8        | $0.6 \pm 0.1$                     | $0.78 \pm 0.09$                   | 0.66        |
| 200         | 7        | $0.61 \pm 0.07$                   | $0.9 \pm 0.2$                     | 0.72        |
| 200         | 6        | $0.6 \pm 0.1$                     | $0.8 \pm 0.2$                     | 0.68        |
| 200         | 5        | $0.61 \pm 0.09$                   | $0.8 \pm 0.1$                     | 0.69        |
| 200         | 4        | $0.69 \pm 0.05$                   | $0.9 \pm 0.1$                     | 0.79        |
| <b>200</b>  | <b>3</b> | <b><math>0.68 \pm 0.06</math></b> | <b><math>0.98 \pm 0.04</math></b> | <b>0.80</b> |

Bold indicates the best recall/precision.
