# Supplementary material
Source: PubMed Central journal article supplement (PMC1187953)
Supplement: pnas_0409746102_19.pdf [file pnas_0409746102_19.pdf]

Table 4: Mode A, “semantically supervised”

| Corpus size | L        | Recall             | Precision        | F1          |
|-------------|----------|--------------------|------------------|-------------|
| 200         | 8        | 0.86 ± 0.06        | 0.7 ± 0.2        | 0.80        |
| 200         | 7        | 0.89 ± 0.04        | 0.8 ± 0.2        | 0.84        |
| 200         | 6        | 0.90 ± 0.04        | 0.8 ± 0.2        | 0.85        |
| 200         | 5        | 0.90 ± 0.03        | 0.8 ± 0.2        | 0.83        |
| 200         | 4        | 0.92 ± 0.03        | 0.8 ± 0.2        | 0.83        |
| <b>200</b>  | <b>3</b> | <b>0.92 ± 0.03</b> | <b>0.9 ± 0.2</b> | <b>0.89</b> |

Bold indicates the best recall/precision.
