# Supplementary material
Source: PubMed Central journal article supplement (PMC1187953)
Supplement: pnas_0409746102_20.pdf [file pnas_0409746102_20.pdf]

Table 5: Mode A, “no spaces”

| Corpus size | L | Recall      | Precision   | F1   |
|-------------|---|-------------|-------------|------|
| 200         | 3 | 0.01 ± 0.01 | 0.91 ± 0.09 | 0.01 |
| 500         | 3 | 0.07 ± 0.04 | 0.89 ± 0.08 | 0.12 |
| 1,000       | 3 | 0.13 ± 0.06 | 0.8 ± 0.1   | 0.23 |
| 2,500       | 3 | 0.30 ± 0.07 | 0.79 ± 0.09 | 0.43 |
| 5,000       | 3 | 0.39 ± 0.08 | 0.85 ± 0.1  | 0.53 |
| 10,000      | 3 | 0.5 ± 0.1   | 0.86 ± 0.09 | 0.65 |
