# Supplementary material
Source: PubMed Central journal article supplement (PMC1187953)
Supplement: pnas_0409746102_21.pdf [file pnas_0409746102_21.pdf]

Table 6: The TA1 grammar, consisting of 50 terminals and 28 rules

|          |                                                                                                 |
|----------|-------------------------------------------------------------------------------------------------|
| $\sigma$ | $\Rightarrow$ s1   s2   s3   s4                                                                 |
| s1       | $\Rightarrow$ prec np2 vp ptag                                                                  |
| s2       | $\Rightarrow$ frec np2 vp ftag                                                                  |
| s3       | $\Rightarrow$ frec iv6 iv55                                                                     |
| s4       | $\Rightarrow$ <i>that</i> np2 iv5 iv6 iv4 np2                                                   |
| np       | $\Rightarrow$ art noun   propn                                                                  |
| np2      | $\Rightarrow$ <i>the</i> noun   propn                                                           |
| propn    | $\Rightarrow$ p vp2   p                                                                         |
| pp       | $\Rightarrow$ p <i>and</i> p vp6   p p <i>and</i> p vp6                                         |
| vp       | $\Rightarrow$ iv <i>and</i> com                                                                 |
| vp2      | $\Rightarrow$ <i>who</i> tv np                                                                  |
| com      | $\Rightarrow$ np iv2                                                                            |
| rec      | $\Rightarrow$ p vp5 <i>that</i> rec   p vp5 <i>that</i>                                         |
| frec     | $\Rightarrow$ pf vp5 <i>that</i> rec                                                            |
| ftag     | $\Rightarrow$ , <i>doesn't she</i> ?                                                            |
| prec     | $\Rightarrow$ pp <i>that</i> rec                                                                |
| ptag     | $\Rightarrow$ , <i>don't they</i> ?                                                             |
| iv5      | $\Rightarrow$ <i>is</i> iv5-ex                                                                  |
| iv55     | $\Rightarrow$ <i>is</i> iv55-ex                                                                 |
| iv6      | $\Rightarrow$ <i>to</i> iv6-ex                                                                  |
| art      | $\Rightarrow$ <i>the</i>   <i>a</i>                                                             |
| noun     | $\Rightarrow$ <i>cat</i>   <i>dog</i>   <i>horse</i>   <i>cow</i>   <i>rabbit</i>   <i>bird</i> |
| p        | $\Rightarrow$ <i>Joe</i>   <i>Beth</i>   <i>Jim</i>   <i>Cindy</i>   <i>Pam</i>   <i>George</i> |
| pf       | $\Rightarrow$ <i>Beth</i>   <i>Cindy</i>   <i>Pam</i>                                           |
| vp5      | $\Rightarrow$ <i>believes</i>   <i>thinks</i>                                                   |
| vp6      | $\Rightarrow$ <i>believe</i>   <i>think</i>                                                     |
| iv       | $\Rightarrow$ <i>meows</i>   <i>barks</i>                                                       |
| iv2      | $\Rightarrow$ <i>laughs</i>   <i>jumps</i>   <i>flies</i>                                       |
| iv5-ex   | $\Rightarrow$ <i>easy</i>   <i>tough</i>   <i>eager</i>                                         |
| iv55-ex  | $\Rightarrow$ <i>easy</i>   <i>tough</i>                                                        |
| iv6-ex   | $\Rightarrow$ <i>please</i>   <i>read</i>                                                       |
| iv4      | $\Rightarrow$ <i>annoys</i>   <i>worries</i>   <i>disturbs</i>   <i>bothers</i>                 |
| tv       | $\Rightarrow$ <i>scolds</i>   <i>loves</i>   <i>adores</i>   <i>worships</i>                    |
