# Supplementary material
Source: PubMed Central journal article supplement (PMC1187953)
Supplement: pnas_0409746102_22.pdf [file pnas_0409746102_22.pdf]

Table 7: ATIS-CFG recall and precision

| Corpus size | No. of learners | L | $\eta$ | Recall | Precision | F1    |
|-------------|-----------------|---|--------|--------|-----------|-------|
| 10,000      | 30              | 3 | 0.6    | 0.380  | 0.623     | 0.472 |
| 10,000      | 30              | 4 | 0.6    | 0.308  | 0.657     | 0.420 |
| 10,000      | 30              | 5 | 0.6    | 0.180  | 0.920     | 0.301 |
| 40,000      | 30              | 3 | 0.6    | 0.643  | 0.568     | 0.603 |
| 40,000      | 30              | 4 | 0.6    | 0.660  | 0.596     | 0.627 |
| 40,000      | 30              | 5 | 0.6    | 0.456  | 0.780     | 0.576 |
| 120,000     | 30              | 3 | 0.6    | 0.910  | 0.538     | 0.676 |
| 120,000     | 30              | 4 | 0.6    | 0.750  | 0.580     | 0.654 |
| 120,000     | 30              | 5 | 0.6    | 0.747  | 0.640     | 0.689 |
| 120,000     | 30              | 6 | 0.6    | 0.465  | 0.818     | 0.593 |
| 120,000     | 150             | 3 | 0.6    | 1.000  | 0.538     | 0.700 |
| 120,000     | 150             | 4 | 0.6    | 1.000  | 0.580     | 0.734 |
| 120,000     | 150             | 5 | 0.6    | 1.000  | 0.640     | 0.780 |
| 120,000     | 150             | 6 | 0.6    | 0.600  | 0.820     | 0.693 |
| 120,000     | 150             | 7 | 0.6    | 0.230  | 0.970     | 0.372 |
