# Supplementary material
Source: PubMed Central journal article supplement (PMC1187953)
Supplement: pnas_0409746102_23.pdf [file pnas_0409746102_23.pdf]

Table 8: Definition of the L1 and L2 languages.

| <b>L1</b>                                | <b>L2</b>                                |
|------------------------------------------|------------------------------------------|
| $P1 \Rightarrow pel - \mathbf{X} - rud$  | $P1 \Rightarrow pel - \mathbf{X} - jic$  |
| $P2 \Rightarrow vot - \mathbf{X} - jic$  | $P1 \Rightarrow vot - \mathbf{X} - tood$ |
| $P3 \Rightarrow dak - \mathbf{X} - tood$ | $P1 \Rightarrow dak - \mathbf{X} - rud$  |

---

$\mathbf{X}(2)=\{\text{wadim, kicey}\}$

$\mathbf{X}(6)=\{\text{wadim, kicey, puser, fengle, coomo, loga}\}$

$\mathbf{X}(12)=\{\text{wadim, kicey, puser, fengle, coomo, loga, gople, taspu, hiftam, benez, vamey, skiger}\}$

$\mathbf{X}(24)=\{\text{wadim, kicey, puser, fengle, coomo, loga, gople, taspu, hiftam, benez, vamey, skiger, benez, gensim, feenam, laeljeen, chila, roosa, plizet, balip, malsig, suleb, nilbo, wiffle}\}$

---
