# Supplementary material
Source: PubMed Central journal article supplement (PMC1187953)
Supplement: pnas_0409746102_24.pdf [file pnas_0409746102_24.pdf]

Table 9: Sample questions from a multiple-choice test used in ESL instruction in Göteborg, Sweden

| <i>Sentence</i>                                      | <i>Choice 1</i> | <i>Choice 2</i> | <i>Choice 3</i> |
|------------------------------------------------------|-----------------|-----------------|-----------------|
| The pilot __ look worried.                           | isn't           | doesn't         | don't           |
| She asked me __ at once.                             | come            | to come         | coming          |
| The tickets have been paid for, so you __ not worry. | may             | dare            | need            |
| We've gone slightly __ course.                       | of              | off             | from            |

A score < 50% in this 100-question test (available online) is considered pre-intermediate, 50 – 70% intermediate, and a score > 70% advanced.
