# Supplementary material
Source: PubMed Central journal article supplement (PMC1187953)
Supplement: pnas_0409746102_25.pdf [file pnas_0409746102_25.pdf]

Table 10: The performance of the ADIOS algorithm versus the SVM-PROT system on level 2.

| <b>Class</b> | <b>TP</b> | <b>FN</b> | <b>FP</b> | <b>TN</b> | <b>ADIOS Q</b> | <b>recall</b> | <b>precision</b> | <b>SVM-PROT Q</b> |
|--------------|-----------|-----------|-----------|-----------|----------------|---------------|------------------|-------------------|
| 1.1          | 333       | 89        | 64        | 1201      | 0.91           | 0.79          | 0.84             | 0.92              |
| 1.2          | 110       | 49        | 26        | 1502      | 0.96           | 0.69          | 0.81             | 0.99              |
| 1.3          | 62        | 36        | 14        | 968       | 0.95           | 0.63          | 0.82             | 0.98              |
| 1.4          | 33        | 23        | 9         | 556       | 0.95           | 0.59          | 0.79             | 0.99              |
| 1.5          | 20        | 19        | 8         | 384       | 0.94           | 0.51          | 0.71             | 0.97              |
| 1.6          | 198       | 23        | 25        | 1441      | 0.97           | 0.90          | 0.89             | 0.99              |
| 1.7          | 23        | 13        | 2         | 365       | 0.96           | 0.64          | 0.92             | 0.99              |
| 1.8          | 51        | 21        | 3         | 717       | 0.97           | 0.71          | 0.94             | 0.99              |
| 1.9          | 117       | 21        | 4         | 1376      | 0.98           | 0.85          | 0.97             | 0.96              |
| 1.10         | 16        | 13        | 0         | 292       | 0.96           | 0.55          | 1.00             | 0.96              |
| 1.11         | 61        | 16        | 3         | 772       | 0.98           | 0.79          | 0.95             | 0.98              |
| 1.13         | 16        | 15        | 2         | 315       | 0.95           | 0.52          | 0.89             | 0.95              |
| 1.14         | 106       | 41        | 13        | 1462      | 0.97           | 0.72          | 0.89             | 0.95              |
| 1.15         | 54        | 4         | 0         | 582       | 0.99           | 0.93          | 1.00             | 0.99              |
| 1.17         | 22        | 6         | 0         | 285       | 0.98           | 0.79          | 1.00             | 0.97              |
| 1.18         | 32        | 10        | 1         | 424       | 0.98           | 0.76          | 0.97             | 0.98              |
