# Supplementary material
Source: PubMed Central journal article supplement (PMC1187953)
Supplement: pnas_0409746102_26.pdf [file pnas_0409746102_26.pdf]

Table 11: The performance of the ADIOS algorithm on level 3.

| Class   | TP  | FN | FP | TN   | Q    | Recall | Precision |
|---------|-----|----|----|------|------|--------|-----------|
| 1.1.1   | 331 | 67 | 48 | 1241 | 0.93 | 0.83   | 0.87      |
| 1.1.3   | 4   | 4  | 0  | 80   | 0.95 | 0.50   | 1.00      |
| 1.1.99  | 6   | 8  | 0  | 147  | 0.95 | 0.43   | 1.00      |
| 1.10.2  | 8   | 8  | 1  | 166  | 0.95 | 0.50   | 0.89      |
| 1.10.3  | 6   | 3  | 0  | 95   | 0.97 | 0.67   | 1.00      |
| 1.10.99 | 3   | 0  | 0  | 30   | 1.00 | 1.00   | 1.00      |
| 1.11.1  | 62  | 15 | 4  | 771  | 0.98 | 0.81   | 0.94      |
| 1.12.99 | 6   | 0  | 0  | 65   | 1.00 | 1.00   | 1.00      |
| 1.13.11 | 15  | 12 | 0  | 277  | 0.96 | 0.56   | 1.00      |
| 1.13.12 | 0   | 3  | 0  | 30   | 0.91 | 0.00   | 0.00      |
| 1.14.11 | 8   | 3  | 0  | 117  | 0.98 | 0.73   | 1.00      |
| 1.14.12 | 4   | 1  | 0  | 55   | 0.98 | 0.80   | 1.00      |
| 1.14.13 | 14  | 11 | 1  | 251  | 0.96 | 0.56   | 0.93      |
| 1.14.14 | 48  | 9  | 0  | 572  | 0.99 | 0.84   | 1.00      |
| 1.14.15 | 8   | 1  | 0  | 95   | 0.99 | 0.89   | 1.00      |
| 1.14.16 | 6   | 0  | 0  | 67   | 1.00 | 1.00   | 1.00      |
| 1.14.18 | 1   | 2  | 0  | 35   | 0.95 | 0.33   | 1.00      |
| 1.14.19 | 6   | 0  | 0  | 65   | 1.00 | 1.00   | 1.00      |
| 1.14.99 | 15  | 3  | 0  | 180  | 0.98 | 0.83   | 1.00      |
| 1.15.1  | 53  | 5  | 2  | 580  | 0.99 | 0.91   | 0.96      |
| 1.16.1  | 2   | 3  | 0  | 52   | 0.95 | 0.40   | 1.00      |
| 1.17.4  | 21  | 7  | 1  | 281  | 0.97 | 0.75   | 0.95      |
| 1.18.1  | 7   | 4  | 0  | 117  | 0.97 | 0.64   | 1.00      |
| 1.18.6  | 25  | 5  | 0  | 307  | 0.99 | 0.83   | 1.00      |
| 1.2.1   | 95  | 29 | 4  | 1236 | 0.98 | 0.77   | 0.96      |
| 1.2.3   | 3   | 0  | 0  | 32   | 1.00 | 1.00   | 1.00      |
| 1.2.4   | 10  | 6  | 0  | 165  | 0.97 | 0.63   | 1.00      |
| 1.2.7   | 2   | 6  | 0  | 82   | 0.93 | 0.25   | 1.00      |
| 1.2.99  | 2   | 5  | 0  | 72   | 0.94 | 0.29   | 1.00      |
| 1.21.3  | 3   | 0  | 0  | 32   | 1.00 | 1.00   | 1.00      |
| 1.3.1   | 29  | 8  | 1  | 369  | 0.98 | 0.78   | 0.97      |
| 1.3.3   | 23  | 11 | 0  | 347  | 0.97 | 0.68   | 1.00      |
| 1.3.5   | 4   | 0  | 0  | 45   | 1.00 | 1.00   | 1.00      |
| 1.3.7   | 0   | 3  | 0  | 37   | 0.93 | 0.00   | 0.00      |
| 1.3.99  | 13  | 5  | 1  | 181  | 0.97 | 0.72   | 0.93      |
| 1.4.1   | 15  | 5  | 0  | 207  | 0.98 | 0.75   | 1.00      |
| 1.4.3   | 10  | 12 | 0  | 222  | 0.95 | 0.45   | 1.00      |
| 1.4.4   | 2   | 1  | 0  | 35   | 0.97 | 0.67   | 1.00      |
| 1.4.99  | 6   | 1  | 0  | 77   | 0.99 | 0.86   | 1.00      |
| 1.5.1   | 18  | 12 | 1  | 299  | 0.96 | 0.60   | 0.95      |
| 1.5.3   | 0   | 3  | 0  | 37   | 0.93 | 0.00   | 0.00      |
| 1.5.99  | 2   | 1  | 0  | 37   | 0.98 | 0.67   | 1.00      |
| 1.6.1   | 4   | 1  | 0  | 52   | 0.98 | 0.80   | 1.00      |
| 1.6.2   | 5   | 0  | 0  | 50   | 1.00 | 1.00   | 1.00      |
| 1.6.5   | 162 | 5  | 8  | 1512 | 0.99 | 0.97   | 0.95      |
| 1.6.99  | 24  | 19 | 8  | 429  | 0.94 | 0.56   | 0.75      |

Table 11 (continued): The performance of the ADIOS algorithm on level 3.

| <b>Class</b> | <b>TP</b> | <b>FN</b> | <b>FP</b> | <b>TN</b> | <b>Q</b> | <b>Recall</b> | <b>Precision</b> |
|--------------|-----------|-----------|-----------|-----------|----------|---------------|------------------|
| 1.7.1        | 10        | 4         | 0         | 145       | 0.97     | 0.71          | 1.00             |
| 1.7.2        | 5         | 0         | 0         | 55        | 1.00     | 1.00          | 1.00             |
| 1.7.3        | 3         | 2         | 0         | 50        | 0.96     | 0.60          | 1.00             |
| 1.7.99       | 5         | 5         | 0         | 107       | 0.96     | 0.50          | 1.00             |
| 1.8.1        | 30        | 4         | 0         | 345       | 0.99     | 0.88          | 1.00             |
| 1.8.4        | 30        | 4         | 0         | 342       | 0.99     | 0.88          | 1.00             |
| 1.9.3        | 110       | 28        | 6         | 1374      | 0.98     | 0.80          | 0.95             |
| 1.97.1       | 3         | 0         | 0         | 32        | 1.00     | 1.00          | 1.00             |
