# Supplementary material
Source: PubMed Central journal article supplement (PMC1187953)
Supplement: pnas_0409746102_27.pdf [file pnas_0409746102_27.pdf]

Table 12: Some of the specific ADIOS patterns appear in specific Enzyme Classes.

| Enzyme Class | Pattern                                      |
|--------------|----------------------------------------------|
| 1.1.1        | WSG {VNVAGV, RT}                             |
| 1.1.1        | GKVIKCKAA VL                                 |
| 1.1.1        | ALVTG {AGK, ST, AAQ, AS, SR, SK, TS, NK} GIG |
| 1.1.1        | ANQNGAIWKLDLG LDA                            |
| 1.1.1        | AAV {GEV, SSVL, STV, SSV} {MN,AQA}           |
| 1.1.1        | LTNKNV IFVAGLGGIGLDTS                        |
| 1.2.1        | IF IDG EH GTTGLQI                            |
| 1.2.1        | VSV IDNLVKGA GQAIQN                          |
| 1.4.3        | TG {FQ,GI} YGL                               |
| 1.6.5        | TD {RVL, LKSLI} AY                           |
| 1.6.5        | IAL {TSL, ME, PT} HT                         |
| 1.8.1        | FT {EL, VLPM, HL} YP                         |
| 1.8.4        | EVR {SAHG,SNA,KNA,RAA,SKL,RFA,KYD} DS        |
| 1.8.4        | {NR,TT} QG                                   |
| 1.11.1       | VKFHWKPTCGVK {SM, CL}                        |
| 1.11.1       | {QE,QP} WWPAD                                |
| 1.11.1       | {AI,AP} KFPDFIHTQKR                          |
| 1.11.1       | FDHER IPERVVHARG                             |
| 1.11.1       | GIPASYR HM GFGSHT                            |
| 1.11.1       | VS LDKARLLWPIKQKYG                           |
| 1.15.1       | FW {VVN,LVN,MP} WD                           |
| 1.18.6       | {IPL,CIG} VHGGQGC MFV                        |
