# Supplementary material
Source: PubMed Central journal article supplement (PMC1187953)

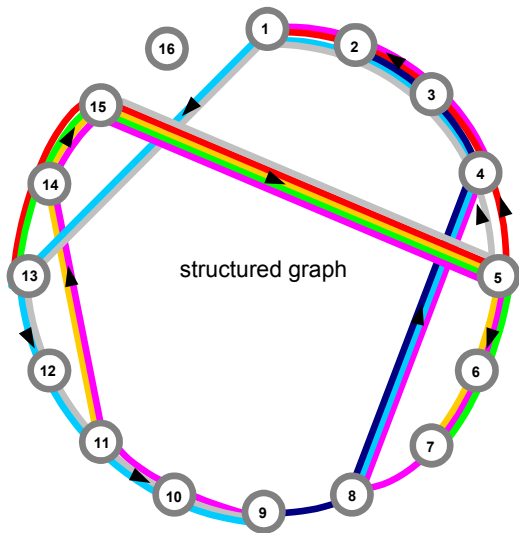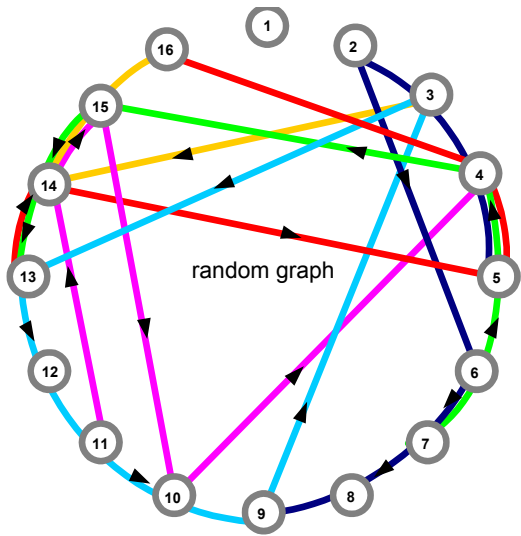

Supplement: pnas_0409746102_1.pdf [file pnas_0409746102_1.pdf]

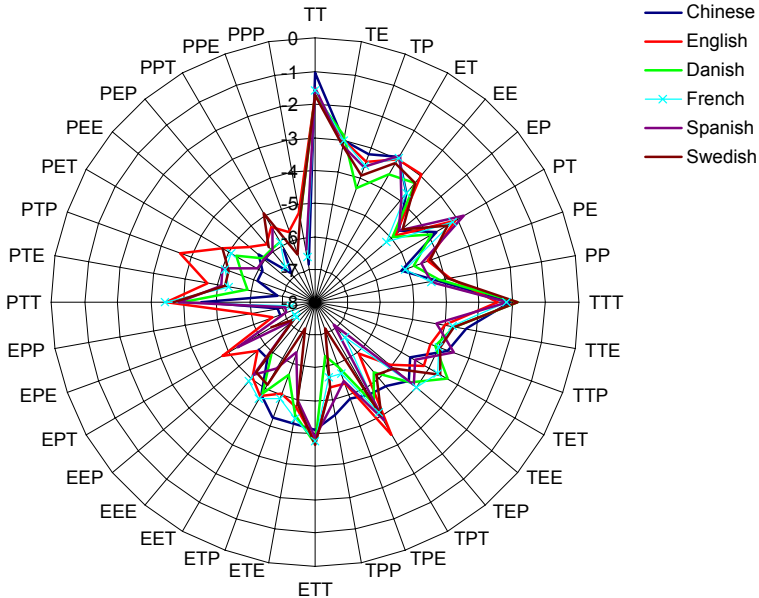

Supplement: pnas_0409746102_10.pdf [file pnas_0409746102_10.pdf]

185 total activity=0.87

● = unseen word

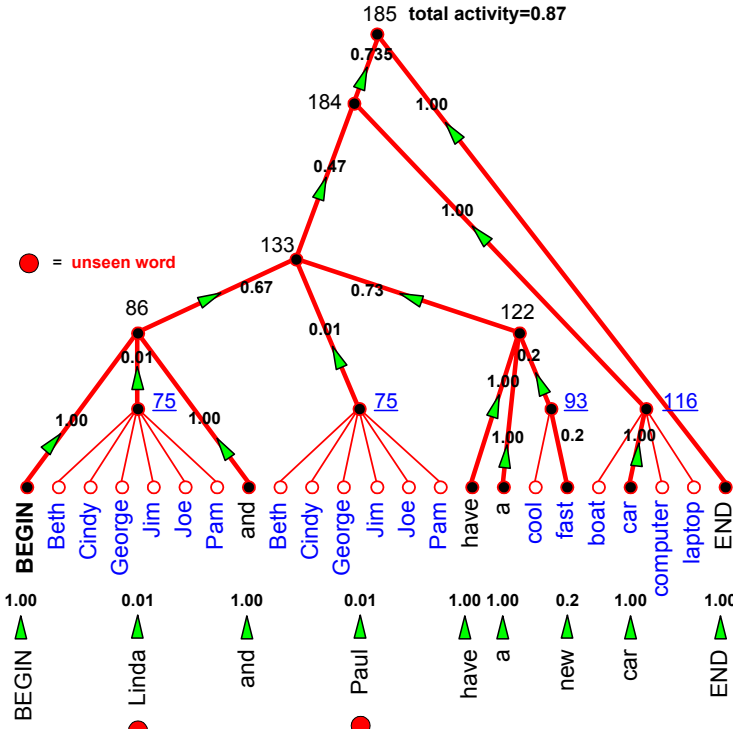

Supplement: pnas_0409746102_11.pdf [file pnas_0409746102_11.pdf]

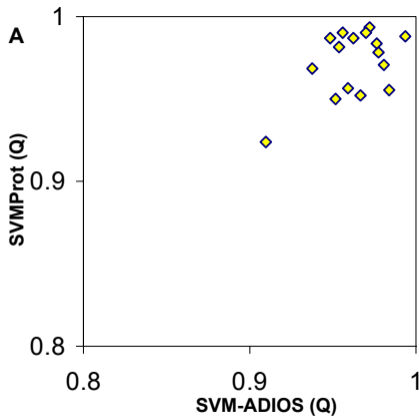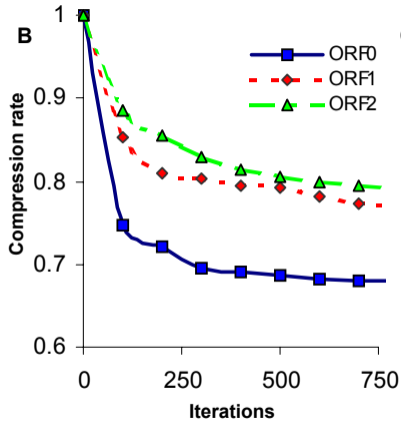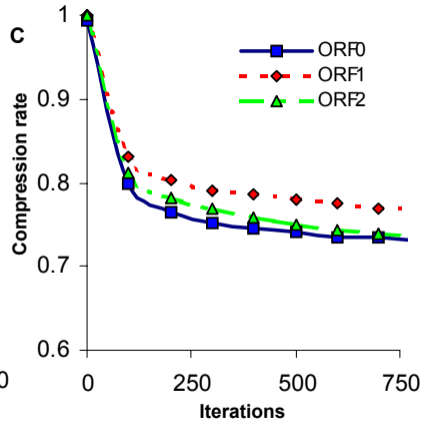

Supplement: pnas_0409746102_12.pdf [file pnas_0409746102_12.pdf]

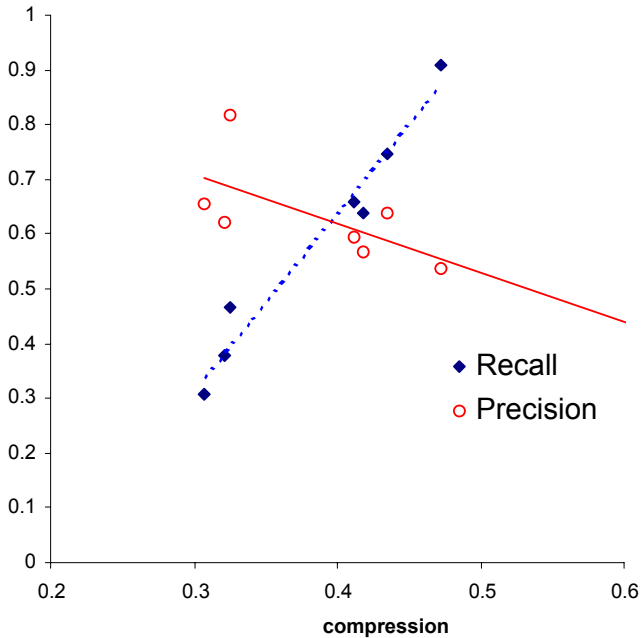

Supplement: pnas_0409746102_13.pdf [file pnas_0409746102_13.pdf]

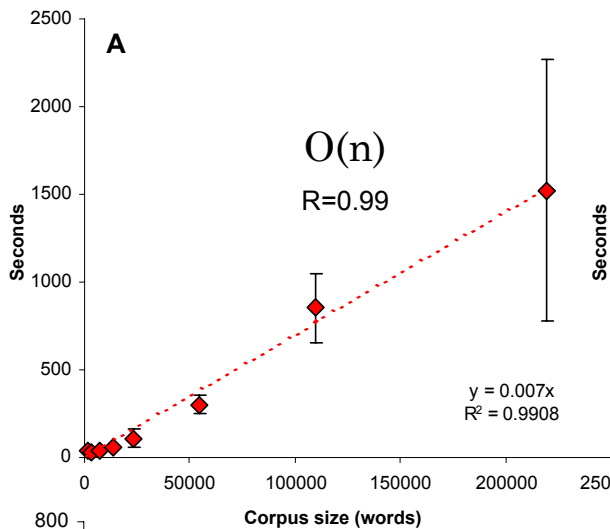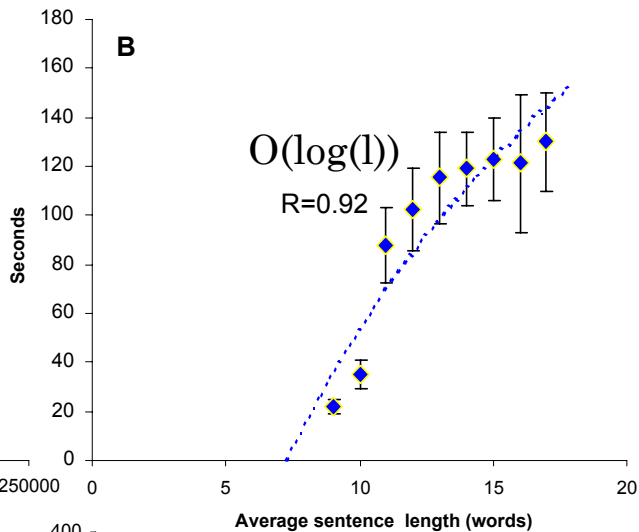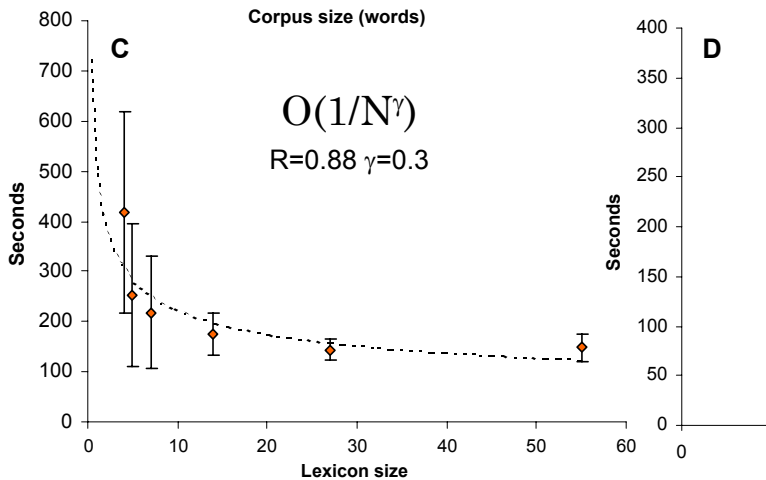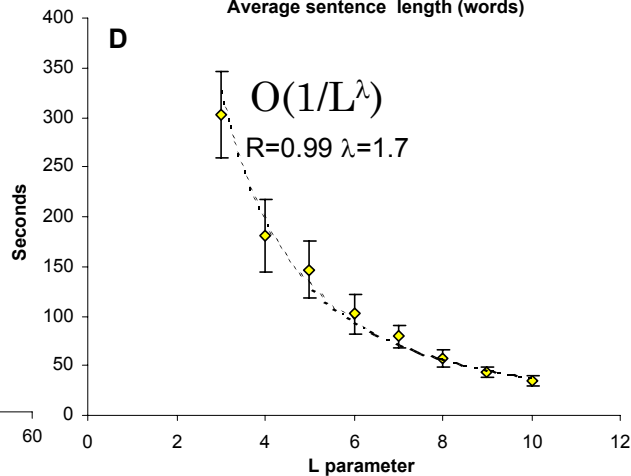

Supplement: pnas_0409746102_14.pdf [file pnas_0409746102_14.pdf]

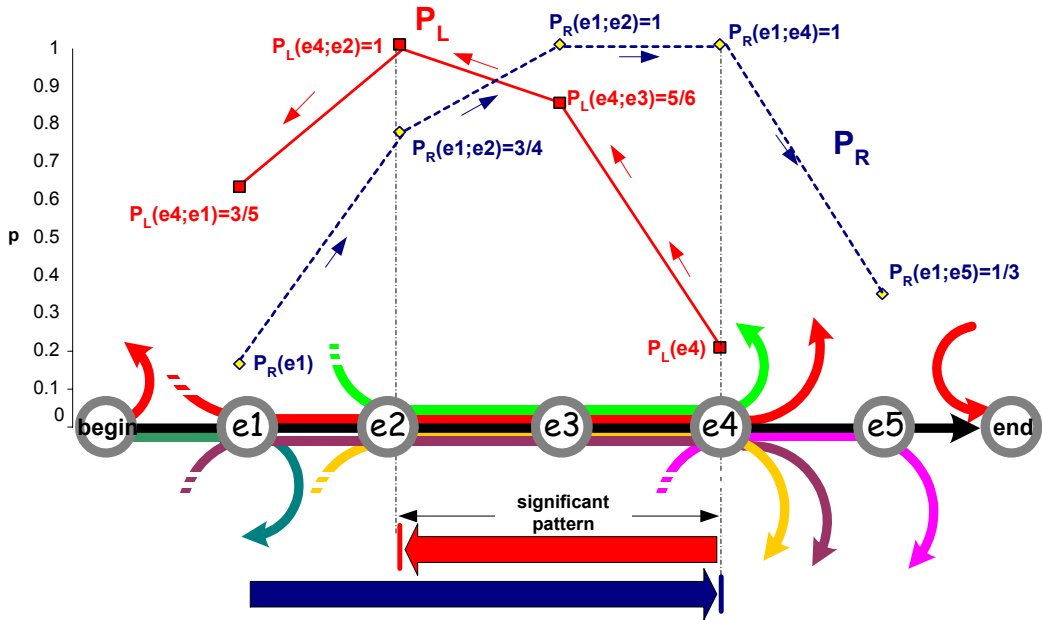

Supplement: pnas_0409746102_2.pdf [file pnas_0409746102_2.pdf]

|              | <i>begin</i> | $e_1$ | $e_2$ | $e_3$ | $e_4$ | $e_5$ | <i>end</i> |
|--------------|--------------|-------|-------|-------|-------|-------|------------|
| <i>begin</i> | 8/41         | 2/4   | 1/3   | 1/3   | 1/3   | 1     | 1          |
| $e_1$        | 2/8          | 4/41  | 3/6   | 3/5   | 3/5   | 1     | 1          |
| $e_2$        | 1/2          | 3/4   | 6/41  | 1     | 1     | 1     | 1          |
| $e_3$        | 1            | 1     | 5/6   | 5/41  | 5/6   | 1/2   | 1          |
| $e_4$        | 1            | 1     | 1     | 1     | 6/41  | 1     | 1/2        |
| $e_5$        | 1            | 1/3   | 1/5   | 1/5   | 2/6   | 2/41  | 1          |
| <i>end</i>   | 1            | 1     | 1     | 1     | 1/2   | 1     | 8/41       |

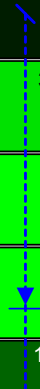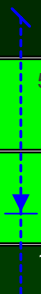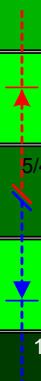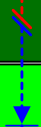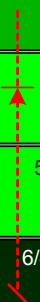

Supplement: pnas_0409746102_3.pdf [file pnas_0409746102_3.pdf]

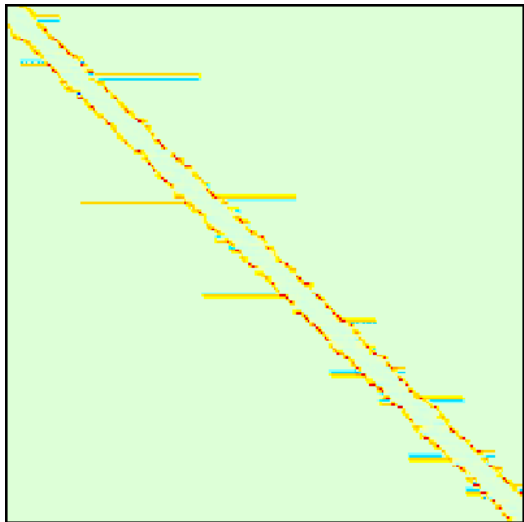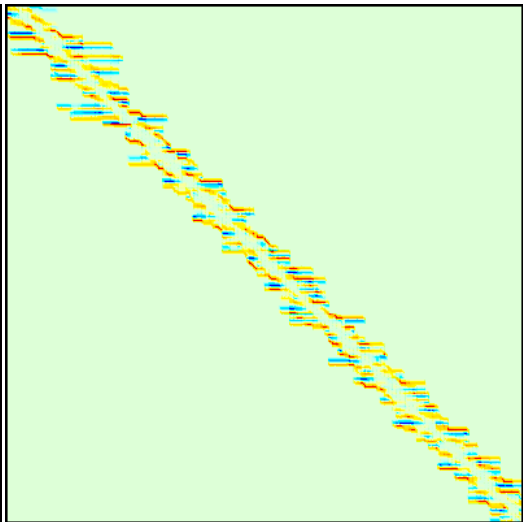

Supplement: pnas_0409746102_4.pdf [file pnas_0409746102_4.pdf]

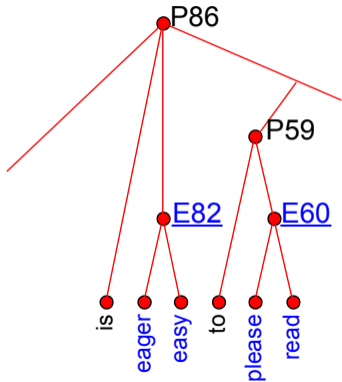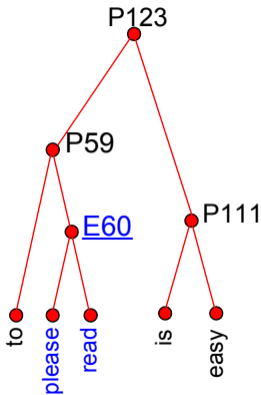

Supplement: pnas_0409746102_5.pdf [file pnas_0409746102_5.pdf]

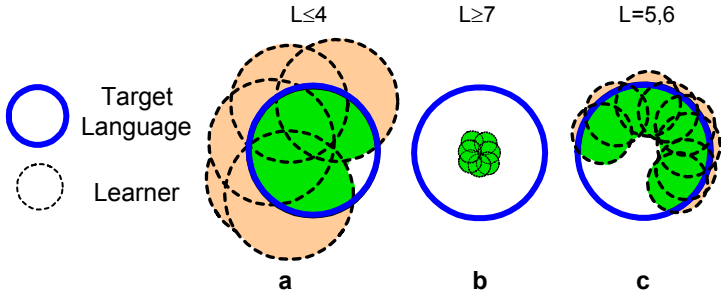

Supplement: pnas_0409746102_6.pdf [file pnas_0409746102_6.pdf]

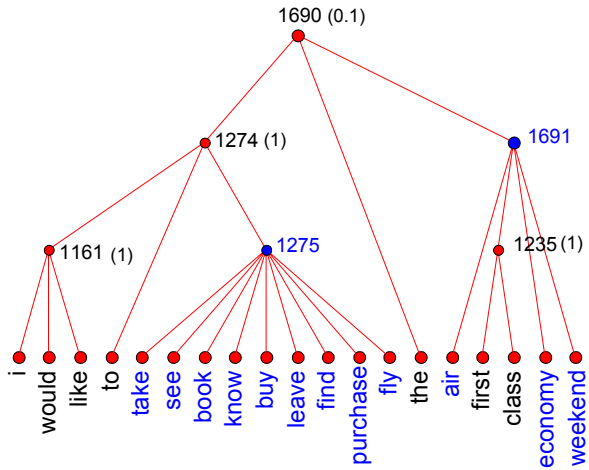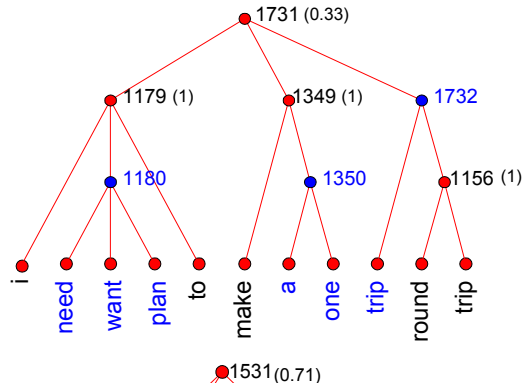

Supplement: pnas_0409746102_7.pdf [file pnas_0409746102_7.pdf]

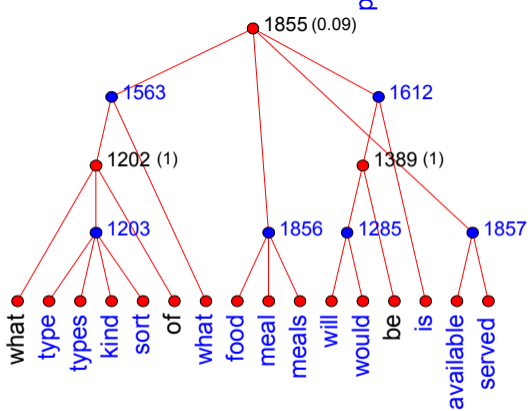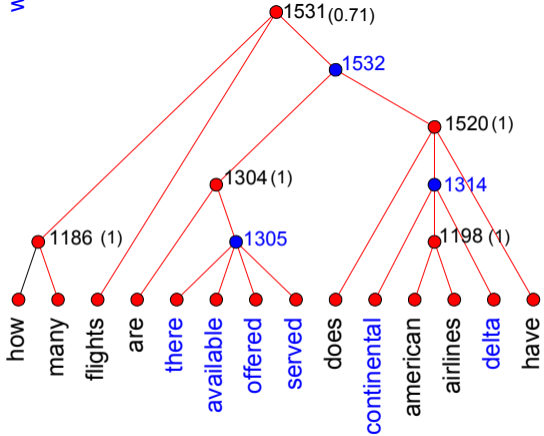

Supplement: pnas_0409746102_8.pdf [file pnas_0409746102_8.pdf]

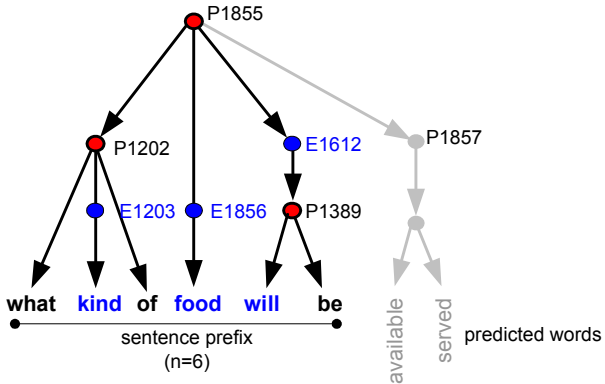

Supplement: pnas_0409746102_9.pdf [file pnas_0409746102_9.pdf]
